# Supplementary material for: Significant Broad-Spectrum Antiviral Activity of Bi121 against Different Variants of SARS-CoV-2
Source: MDPI journal article supplement (doi:10.3390/v15061299), 2023-05-31
Supplement: s1 [file s1]

Supplemental figure

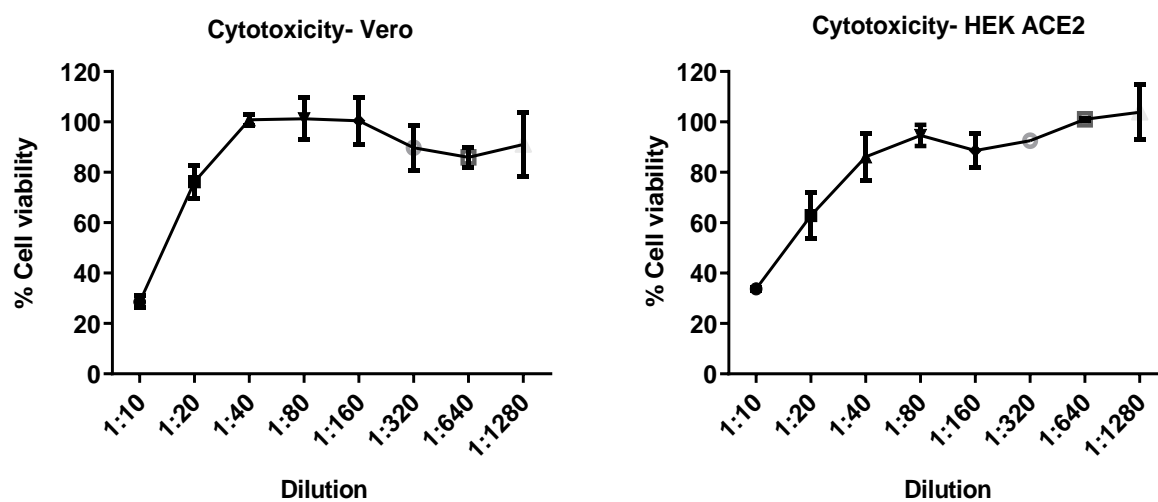

Figure S1a. Cytotoxicity of Bi121 was measured in VeroE6 and HEK-ACE2 cells by MTT assay.

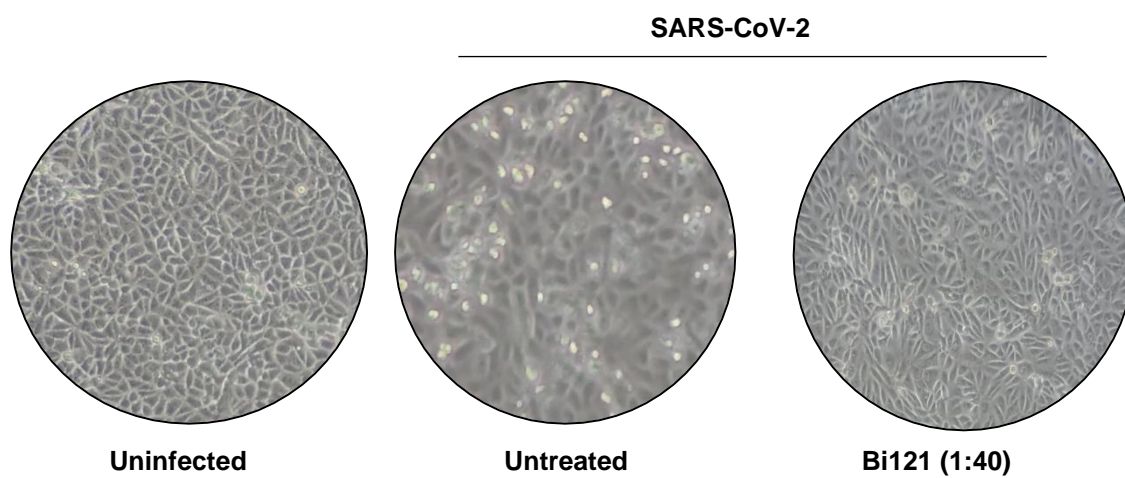

**Figure S1b.** Representative well images of SARS-CoV-2 infected VeroE6 cells in untreated and Bi121 treated
